# Supplementary material
Source: ML conference proceedings conference paper supplement (https://proceedings.neurips.cc/paper_files/paper/2015/hash/4f398cb9d6bc79ae567298335b51ba8a-Abstract.html)
Supplement: Supplementary file [file 4f398cb9d6bc79ae567298335b51ba8a-Supplemental.zip]

## A Proofs

### A.1 Proof of Lemma 6

*Proof.* Assume, without loss of generality, that  $x$  is the origin of  $\mathbb{R}^d$ . Recall that the Dikin ellipsoid at  $x$  is contained in  $K$ . By definition,  $K$  is itself contained in a Euclidean ball of radius  $D$  centered at  $x$ . Therefore the Dikin ellipsoid at  $x$  is contained in the  $D$ -radius Euclidean ball. Therefore, the gauge function (Minkowski functional) defined by this Dikin ellipsoid (which is exactly  $\|\cdot\|_x$ ) is greater or equal to the gauge function defined by the  $D$ -radius Euclidean ball (which is  $D^{-1}\|\cdot\|_2$ ). We proved one direction of the bound in the claim:

$$\forall z \in \mathbb{R}^d \quad \frac{1}{D}\|z\|_2^2 \leq z^\top \nabla^2 R(x) z .$$

Plugging  $z' = (\nabla^2 R(x))^{-1/2} z$  into the inequality above gives

$$\forall z' \in \mathbb{R}^d \quad \frac{1}{D} z'^\top (\nabla^2 R(x))^{-1} z' \leq \|z'\|_2^2 ,$$

which concludes the proof.  $\square$

### A.2 Proof of Lemma 12

*Proof.* We prove claim (i) by complete induction on  $t$ . For  $t = 1$ , it holds by definition that  $\bar{g}_1 = \hat{g}_1/(k+1)$ . Lemma 8 bounds  $\|\hat{g}_s\|_{x_s,*} \leq d/\delta$ , and therefore  $\|\bar{g}_1\|_{x_t,*} \leq d/(\delta(k+1))$ . The assumption that  $k \geq 0$  proves the claim.

Next, we deal with  $t > 1$ . Using the triangle inequality, we have

$$\|\bar{g}_t\|_{x_t,*} \leq \frac{1}{k+1} \sum_{i=0}^k \|\hat{g}_{t-i}\|_{x_t,*} . \quad (9)$$

Lemma 8 gives us an upper bound on  $\|\hat{g}_{t-i}\|_{x_{t-i},*}$ , which is not the same norm as in Eq. (9). Therefore, our proof strategy is to show that these two norms are only a factor of 2 apart.

Assume, by complete induction, that  $\|\bar{g}_s\|_{x_s,*} \leq 2d/\delta$  for all  $s < t$ . It follows that  $\eta\|\bar{g}_s\|_{x_s,*} \leq 2\eta d/\delta$ . Using our assumption that  $12k\eta d \leq \delta$  and the fact that  $k \geq 1$ , we conclude that  $\eta\|\bar{g}_s\|_{x_s,*} \leq \frac{1}{4}$ . Therefore, the condition of Lemma 7 holds and we have

$$\|x_{s+1} - x_s\|_{x_s} \leq 2\eta\|\bar{g}_s\|_{x_s,*} .$$

Again using the induction hypothesis, we have

$$\|x_{s+1} - x_s\|_{x_s} \leq \frac{4\eta d}{\delta} .$$

By our assumption that  $12k\eta d \leq \delta$  it follows that the right-hand side above is at most  $1/3$ , the conditions of Theorem 4 are satisfied, and we have

$$\left(1 - \frac{4\eta d}{\delta}\right)^2 (\nabla^2 R(x_s))^{-1} \preceq (\nabla^2 R(x_{s+1}))^{-1} \preceq \left(1 - \frac{4\eta d}{\delta}\right)^{-2} (\nabla^2 R(x_s))^{-1} .$$

Recalling the definition of the dual local norm (see Definition 2), it follows that

$$\forall z \in \mathbb{R}^d, \quad \left(1 - \frac{4\eta d}{\delta}\right)\|z\|_{x_s,*} \leq \|z\|_{x_{s+1},*} \leq \left(1 - \frac{4\eta d}{\delta}\right)^{-1}\|z\|_{x_s,*} .$$

By applying this inequality recursively, we get that for any positive  $s \in \{t-k+1, \dots, t\}$

$$\forall z \in \mathbb{R}^d, \quad \left(1 - \frac{4\eta d}{\delta}\right)^k \|z\|_{x_s,*} \leq \|z\|_{x_t,*} \leq \left(1 - \frac{4\eta d}{\delta}\right)^{-k} \|z\|_{x_s,*} .$$

Next we show that  $(1 - 4\eta d/\delta)^k$  is at least  $\frac{1}{2}$ . If  $k = 0$ , this is trivial. If  $k > 0$  denote  $\beta = 4\eta d/\delta$  and notice that  $\beta \leq \frac{1}{3}$  due to the assumption that  $12k\eta d \leq \delta$ . Then, apply the inequality  $1 - \beta \geq \exp(-2\beta)$ , which is valid for any  $\beta \in [0, \frac{1}{2}]$ , to bound  $(1 - 4\eta d/\delta)^k \geq \exp(-8k\eta d/\delta) \geq \exp(-\frac{2}{3}) \geq \frac{1}{2}$ . Similarly,  $(1 - 4\eta d/\delta)^{-k}$  is at most 2. We conclude that

$$\frac{1}{2}\|z\|_{x_s,*} \leq \|z\|_{x_t,*} \leq 2\|z\|_{x_s,*} , \quad (10)$$

which proves claim (ii). Combining this bound with Eq. (9) gives

$$\|\bar{g}_t\|_{x_t,*} \leq \frac{2}{k+1} \sum_{i=0}^k \|\hat{g}_{t-i}\|_{x_{t-i},*} .$$

Applying the bound  $\|\hat{g}_{t-i}\|_{x_{t-i},*} \leq d/\delta$  from Lemma 8 concludes the inductive proof.  $\square$

We prove a simple corollary of Lemma 12, which shows that the assumption  $12k\eta d \leq \delta$  (which we make throughout our analysis) implies the conditions of Lemma 7.

**Corollary 15.** *If  $12k\eta d \leq \delta$  then  $\eta\|\bar{g}_t\|_{x_t,*} \leq \frac{1}{4}$  for all  $t$ .*

*Proof.* Lemma 12 states that  $\|\bar{g}_t\|_{x_t,*} \leq 2d/\delta$  and therefore  $\eta\|\bar{g}_t\|_{x_t,*} \leq 2d\eta/\delta$ . Since  $k \geq 1$ , the assumption that  $12k\eta d \leq \delta$  implies that the above is at most  $1/6$ , and certainly less than  $1/4$ .  $\square$

### A.3 $\hat{f}_t$ is $L$ -Lipschitz and $H$ -Smooth

An important property of the function  $\hat{f}_t$  is that it retains the properties of  $f_t$ .

**Lemma 16.** *Let  $f : K \mapsto [0, 1]$  be differentiable  $L$ -Lipschitz, and  $H$ -smooth, and let  $\hat{f}_t(x) = \mathbb{E}[f(x + \delta Av)]$ , where  $\delta > 0$ ,  $A$  is full-rank  $d \times d$  matrix and  $v$  is a random vector. Then  $\hat{f}$  is also  $L$ -Lipschitz and  $H$ -smooth.*

*Proof of Lemma 16.* First, we prove that  $\hat{f}$  is  $L$ -Lipschitz. For any  $x, y \in K$ , we have

$$\hat{f}(x) - \hat{f}(y) = \mathbb{E}[f(x + \delta Av) - f(y + \delta Av)] \leq \mathbb{E}[L\|x - y\|_2] ,$$

where the inequality follows from the assumption that  $f$  itself is  $L$ -Lipschitz.

Next, we prove that  $\hat{f}$  is  $H$ -Smooth. For any  $x, y \in K$ , we have

$$\|\nabla \hat{f}(x) - \nabla \hat{f}(y)\| = \|\nabla \mathbb{E}[f(x + \delta Av)] - \nabla \mathbb{E}[f(y + \delta Av)]\| .$$

We can switch the order of the expectation and the differentiation due to uniform boundedness, and the right-hand side above becomes

$$\|\mathbb{E}[\nabla f(x + \delta Av) - \nabla f(y + \delta Av)]\| .$$

From Jensen's inequality, the above is bounded by

$$\mathbb{E}\left[\|\nabla f(x + \delta Av) - \nabla f(y + \delta Av)\|\right] .$$

The term inside the square brackets is bounded by  $H\|x - y\|_2$  due to the assumption that  $f$  is  $H$ -smooth. This proves that  $\hat{f}$  is also  $H$ -smooth.  $\square$

### A.4 Proof of Lemma 13

*Proof.* From the definition of  $\bar{g}_t$  and the triangle inequality, we bound

$$\|\bar{g}_t\|_{x_t,*} = \frac{1}{k+1} \left\| \sum_{i=0}^k \hat{g}_{t-i} \right\|_{x_t,*} \leq \frac{1}{k+1} \left\| \sum_{i=0}^k \mathbb{E}_{t-i}[\hat{g}_{t-i}] \right\|_{x_t,*} + \frac{1}{k+1} \left\| \sum_{i=0}^k \hat{g}_{t-i} - \mathbb{E}_{t-i}[\hat{g}_{t-i}] \right\|_{x_t,*} .$$

Using  $(\beta + \gamma)^2 \leq 2\beta^2 + 2\gamma^2$  and taking expectations, we have

$$\mathbb{E}[\|\bar{g}_t\|_{x_t,*}^2] \leq \frac{2}{k^2} \mathbb{E} \left[ \left\| \sum_{i=0}^k \mathbb{E}_{t-i}[\hat{g}_{t-i}] \right\|_{x_t,*}^2 \right] + \frac{2}{k^2} \mathbb{E} \left[ \left\| \sum_{i=0}^k \hat{g}_{t-i} - \mathbb{E}_{t-i}[\hat{g}_{t-i}] \right\|_{x_t,*}^2 \right] . \quad (11)$$

We deal separately with each of the two terms on the right-hand side above. Using Eq. (6), we have

$$\left\| \sum_{i=0}^k \mathbb{E}_{t-i}[\hat{g}_{t-i}] \right\|_{x_t,*} \leq D \left\| \sum_{i=0}^k \mathbb{E}_{t-i}[\hat{g}_{t-i}] \right\|_2 .$$

Triangle inequality upper bounds the right-hand side above by  $D \sum_{i=0}^k \|\mathbb{E}_{t-i}[\hat{g}_{t-i}]\|_2$ . By Theorem 1, this equals  $D \sum_{i=0}^k \|\nabla \hat{f}_{t-i}(x_{t-i})\|_2$ . The functions  $\hat{f}_{t-i}$  are  $L$ -Lipschitz due to Lemma 16, so the first term on the right-hand side of Eq. (11) is upper-bounded by  $2D^2L^2$ .

Moving on to the second term in Eq. (11), we abbreviate  $h_s = \hat{g}_s - \mathbb{E}_s[\hat{g}_s]$  for all  $s$  and study the term  $\mathbb{E}[\|\sum_{i=0}^k h_{t-i}\|_{x_t,*}^2]$ . Using Lemma 12, we bound

$$\mathbb{E}\left[\left\|\sum_{i=0}^k h_{t-i}\right\|_{x_t,*}^2\right] \leq 4\mathbb{E}\left[\left\|\sum_{i=0}^k h_{t-i}\right\|_{x_{t-k},*}^2\right].$$

Using the definition of the local norm, we write the right-hand side above as

$$4\mathbb{E}\left[\sum_{i=0}^k \sum_{j=0}^k h_{t-i}^\top (\nabla^2 R(x_{t-k}))^{-1} h_{t-j}\right]. \quad (12)$$

Now note that the sequence  $h_1, \dots, h_T$  is a martingale difference sequence, and therefore its increments are uncorrelated. Namely, for  $i > j$  it holds that

$$\mathbb{E}_{t-j}\left[h_{t-i}^\top (\nabla^2 R(x_{t-k}))^{-1} h_{t-j}\right] = 0.$$

Therefore, Eq. (12) equals

$$4 \sum_{i=0}^k \mathbb{E}[\|h_{t-i}\|_{x_{t-k},*}^2].$$

Another application of Lemma 12 gives the bound

$$\mathbb{E}\left[\left\|\sum_{i=0}^k h_{t-i}\right\|_{x_t,*}^2\right] \leq 16 \sum_{i=0}^k \mathbb{E}[\|h_{t-i}\|_{x_{t-i},*}^2]. \quad (13)$$

Each term  $\mathbb{E}_s[\|h_s\|_{x_s,*}^2]$  satisfies

$$\mathbb{E}_s[h_s^\top (\nabla^2 R(x_s))^{-1} h_s] = \mathbb{E}_s[\hat{g}_s^\top (\nabla^2 R(x_s))^{-1} \hat{g}_s] - \mathbb{E}_s[\hat{g}_s]^\top (\nabla^2 R(x_s))^{-1} \mathbb{E}_s[\hat{g}_s].$$

The right-most term above is non-negative because  $(\nabla^2 R(x_s))^{-1}$  is positive semi-definite, so  $\mathbb{E}_s[\|h_s\|_{x_s,*}^2] \leq \mathbb{E}_s[\|\hat{g}_s\|_{x_s,*}^2]$ , which Lemma 8 further bounds by  $d^2/\delta^2$ . Plugging this back into Eq. (13) gives

$$\mathbb{E}\left[\left\|\sum_{i=0}^k h_{t-i}\right\|_{x_t,*}^2\right] \leq \frac{16kd^2}{\delta^2}.$$

Overall, we have shown that the second term on the right-hand side of Eq. (11) is upper-bounded by  $32d^2/(\delta^2(k+1))$ .  $\square$

## A.5 Proof of Lemma 14

*Proof.* Using triangle inequality, we get

$$\mathbb{E}[\|x_{t-i} - x_t\|_2] \leq \sum_{s=t-i}^{t-1} \mathbb{E}[\|x_s - x_{s+1}\|_2],$$

and we bound each term individually. For any  $s$ , using Lemma 6, it holds that

$$\|x_s - x_{s+1}\|_2 \leq D\|x_s - x_{s+1}\|_{x_s}. \quad (14)$$

By Corollary 15, the conditions of Lemma 7 are met, so the right-hand side of Eq. (14) is bounded by  $2D\eta\|\bar{g}_s\|_{x_s,*}$ . Therefore

$$\mathbb{E}[\|x_s - x_{s+1}\|_2] \leq 2D\eta \mathbb{E}[\|\bar{g}_s\|_{x_s,*}]. \quad (15)$$

Using Jensen's inequality, we have

$$\mathbb{E}[\|\bar{g}_s\|_{x_s,*}] \leq \sqrt{\mathbb{E}[\|\bar{g}_s\|_{x_s,*}^2]}$$

The right-hand side above is upper-bounded by Lemma 13. Using the fact that  $\sqrt{a+b} \leq \sqrt{a} + \sqrt{b}$ , we obtain

$$\mathbb{E}[\|\bar{g}_s\|_{x_s,*}] \leq 2D^2L^2 + \frac{6d}{\delta\sqrt{k+1}}.$$

Plugging back into Eq. (15) gives

$$\mathbb{E}[\|x_s - x_{s+1}\|_2] \leq 4D^3L^2\eta + \frac{12Dd\eta}{\delta\sqrt{k}}.$$

The claim follows from the assumption that  $i \leq k$ .  $\square$

## A.6 Proof of Lemma 11

We begin with a technical lemma.

**Lemma 17.** *Assume that the parameters  $k$ ,  $\eta$ , and  $\delta$  are chosen such that  $12k\eta d \leq \delta$ , and for any  $\epsilon \in (0, 1)$  it holds that*

$$\sum_{t=1}^T \bar{g}_t \cdot (x_t - x^*) \leq \frac{\vartheta \log \frac{1}{\epsilon}}{\eta} + 2\eta \sum_{t=1}^T \|\bar{g}_t\|_{x_t,*}^2 + O(\epsilon T/\delta).$$

*Proof.* Let  $y$  be the analytic center of the convex body  $K$  and recall the definition of the shrunk set  $K_{y,\epsilon}$  in Section 2.3. Define  $x' = \arg \min_{x \in K_{y,\epsilon}} \|x - x^*\|_2$ , the Euclidean projection of  $x^*$  onto  $K_{y,\epsilon}$ . Since  $x' \in K_{y,\epsilon}$ , Theorem 5 states that

$$R(x) \leq \vartheta \log \frac{1}{\epsilon}.$$

Lemma 7 holds due to Corollary 15, and states that

$$\sum_{t=1}^T \bar{g}_t \cdot (x_t - x') \leq \frac{1}{\eta} \vartheta \log \frac{1}{\epsilon} + 2\eta \sum_{t=1}^T \|g_t\|_{x_t,*}^2.$$

To replace  $x'$  with  $x^*$  in the above, we note that

$$\sum_{t=1}^T \bar{g}_t \cdot (x_t - x^*) - \sum_{t=1}^T \bar{g}_t \cdot (x_t - x') \leq T \|\bar{g}_t\|_2 \|x' - x^*\|_2.$$

Since the diameter of  $K$  is  $D$ , it follows that  $\|x' - x^*\|_2 \leq \epsilon D$ . The norm  $\|\bar{g}_t\|_2$  is bounded by  $D\|\bar{g}_t\|_{x_t,*}$ , Lemma 12 bounds by  $2dD/\delta$ .  $\square$

We are ready to prove the main theorem.

*Proof of Lemma 11.* By the definition of  $\bar{f}_t$  in Eq. (7), it holds that

$$\sum_{t=1}^T \hat{f}_t(x_t) - \bar{f}_t(x_t) = \frac{1}{k+1} \sum_{t=1}^{T-k} \sum_{i=1}^k \hat{f}_t(x_{t+i}) - \hat{f}_t(x_t) + \sum_{t=T-k+1}^T \frac{T-t+1}{k+1} \hat{f}_t(x_t).$$

Lemma 16 tells us that each  $\hat{f}_t$  is  $L$ -Lipschitz, and we know that its range is  $[0, 1]$ . Therefore, the above can be upper-bounded by

$$\frac{1}{k+1} \sum_{t=1}^{T-k} \sum_{i=1}^k L \|x_{t+i} - x_t\|_2 + k.$$

Lemma 14 bounds each term  $\|x_{t+i} - x_t\|_2$  and establishes the stated bound over Eq. (8a).

Moving on to Eq. (8b), we use the convexity of  $\bar{f}$  to bound

$$\begin{aligned} \mathbb{E} \left[ \sum_{t=1}^T \bar{f}_t(x_t) - \bar{f}_t(x^*) \right] &\leq \mathbb{E} \left[ \sum_{t=1}^T \nabla \bar{f}_t(x_t) \cdot (x_t - x^*) \right] \\ &= \mathbb{E} \left[ \sum_{t=1}^T (\nabla \bar{f}_t(x_t) - \bar{g}_t) \cdot (x_t - x^*) \right] + \mathbb{E} \left[ \sum_{t=1}^T \bar{g}_t \cdot (x_t - x^*) \right]. \end{aligned}$$

Recalling that  $x_t$  is the result of a dual averaging step using the gradient estimates  $\bar{g}_1, \dots, \bar{g}_{t-1}$ , Lemma 17 states that

$$\mathbb{E} \left[ \sum_{t=1}^T \bar{g}_t \cdot (x_t - x^*) \right] \leq \frac{\vartheta \log \frac{1}{\epsilon}}{\eta} + 2\eta \sum_{t=1}^T \mathbb{E} [\|\bar{g}_t\|_{x_t, *}^2] + O(\epsilon T / \delta).$$

Using Lemma 13, we bound the above by

$$\frac{\vartheta \log \frac{1}{\epsilon}}{\eta} + \frac{64d^2 \eta T}{\delta^2(k+1)} + O(T(\epsilon/\delta + \eta)).$$

It remains to bound the term

$$\mathbb{E} \left[ \sum_{t=1}^T (\nabla \bar{f}_t(x_t) - \bar{g}_t) \cdot (x_t - x^*) \right]. \quad (16)$$

Using the definitions of  $\bar{f}_t$  and  $\bar{g}_t$ , we rewrite it as

$$\frac{1}{k+1} \sum_{t=1}^T \sum_{i=0}^k \mathbb{E} [(\nabla \hat{f}_{t-i}(x_t) - \hat{g}_{t-i}) \cdot (x_t - x^*)].$$

Note that the random variable  $x_s$  is determined by the randomness before time  $s$ , while  $\hat{g}_s$  is only determined when we expose the randomness on round  $s$ . Therefore, This term equals

$$\frac{1}{k+1} \sum_{t=1}^T \sum_{i=0}^k \mathbb{E} [(\nabla \hat{f}_{t-i}(x_t) - \mathbb{E}_{t-i}[\hat{g}_{t-i}]) \cdot (x_t - x^*)].$$

Using Lemma 1 states that  $\mathbb{E}_{t-i}[\hat{g}_{t-i}]$  above equals  $\nabla \hat{f}_{t-i}(x_{t-i})$ . Cauchy-Schwartz bounds this by

$$\frac{1}{k+1} \sum_{t=1}^T \sum_{i=0}^k \mathbb{E} [\|\nabla \hat{f}_{t-i}(x_{t-i}) - \nabla \hat{f}_{t-1}(x_{t-i})\|_2 \|x_t - x^*\|_2].$$

The term  $\|x_t - x^*\|_2$  is bounded by  $D$ . Lemma 16 states that  $\hat{f}_{t-i}$  is  $H$ -smooth; together with Lemma 14 we have the bound

$$\|\nabla \hat{f}_{t-i}(x_{t-i}) - \nabla \hat{f}_{t-1}(x_{t-i})\|_2 \leq 12H D d \frac{\eta \sqrt{k}}{\delta} + O(\eta k).$$

Plugging these bounds back into Eq. (16) gives the desired bound of Eq. (8b).

Moving on to the last term,

$$\mathbb{E} \left[ \sum_{t=1}^T \bar{f}_t(x^*) - \hat{f}_t(x^*) \right],$$

it is not hard to show that the sum inside the expectation is non-positive. Indeed, each  $\bar{f}_t$  is a moving average of the  $\hat{f}_t$ 's, so that up to boundary effects the sum of the  $\bar{f}_t(x^*)$  terms equals the sum of the  $\hat{f}_t(x^*)$  ones; considering the boundary effects, we see that the first sum can only be smaller than the latter. This implies that Eq. (8c)  $\leq 0$ , and concludes the proof.  $\square$
